# Supplementary material for: Selection of Durum Wheat and SSR Markers for Organic Farming in Central Italy Using AMMI Analysis
Source: MDPI journal article supplement (doi:10.3390/agronomy14030458), 2024-02-26
Supplement: s1 [file s1]

Table S1. Origin and Pedigree of durum wheat varieties.

| <b>Durum wheat varieties</b> | <b>Origin</b>  | <b>Pedigree</b>                                                             |
|------------------------------|----------------|-----------------------------------------------------------------------------|
| Azeghar2-1(56)               | ICARDA, SYR    | Selection from AZEGHAR2: 20048Traikia(Mor)/Mrb5//Stj3                       |
| Sebatel2-45                  | ICARDA, SYR    | Selection from Sebatel-2//Wdz6/Gil4 (ICD02-0992-C-12AP-0AP-2AP-0AP-2AP-0AP) |
| Icajin 38(64)                | ICARDA, SYR    | Selection from Icajihan1 (ICD01-0251-T-4AP-TR-1AP-0AP)                      |
| Mv-Makaroni                  | HUNGARY        | Selected from MTA-ATK Martonvasar (HU) crosses                              |
| Mv-Pelsodur                  | HUNGARY        | Selected from MTA-ATK Martonvasar (HU) crosses                              |
| MVTD15-19                    | HUNGARY        | Selected from MTA-ATK Martonvasar (HU) crosses                              |
| MVTD20-19                    | HUNGARY        | Selected from MTA-ATK Martonvasar (HU) crosses                              |
| Mv-Vekadur                   | HUNGARY        | Selected from MTA-ATK Martonvasar (HU) crosses                              |
| Iride                        | ITALY          | Altar 84/Ares (= Ionio)                                                     |
| Saragolla                    | ITALY          | Iride/Linea PSB 0114 PBS                                                    |
| Senatore Cappelli            | ITALY          | Selection from North African landraces Jennah Khetifa                       |
| Vulci                        | MA             | Varieties released by Syngenta Company in the Mediterranean area            |
| Fuego                        | MA             | Varieties released by Syngenta Company in the Mediterranean area            |
| Gibraltar                    | MA             | Varieties released by Syngenta Company in the Mediterranean area            |
| HFN 94n                      | Unknown origin |                                                                             |

Table S2. The 38 co-dominant SSR markers associated with traits important for organic farming.

| <b>Biotic stress</b>                 | <b>Chr.</b> | <b>Marker</b> | <b>References</b>                                                                                                                                                                                                                                                                                                                                    |
|--------------------------------------|-------------|---------------|------------------------------------------------------------------------------------------------------------------------------------------------------------------------------------------------------------------------------------------------------------------------------------------------------------------------------------------------------|
| POWDERY MILDEW                       | <b>5BL</b>  | wmc75         | Alam, M. A., Mandal, M. S. N., Wang, C., & Ji, W. (2013). Chromosomal location and SSR markers of a powdery mildew resistance gene in common wheat line N0308. <i>African Journal of microbiology research</i> , 7(6), 477-482.                                                                                                                      |
| LEAF RUST                            | <b>1B</b>   | gwm18         | Kthiri, D., Loladze, A., N'Diaye, A., Nilsen, K. T., Walkowiak, S., Dreisigacker, S., & Pozniak, C. J. (2019). Mapping of genetic loci conferring resistance to leaf rust from three globally resistant durum wheat sources. <i>Frontiers in Plant Science</i> , 10, 1247.                                                                           |
| LEAF RUST                            | <b>1B</b>   | Xbarc187      | Kthiri, D., Loladze, A., N'Diaye, A., Nilsen, K. T., Walkowiak, S., Dreisigacker, S., & Pozniak, C. J. (2019). Mapping of genetic loci conferring resistance to leaf rust from three globally resistant durum wheat sources. <i>Frontiers in Plant Science</i> , 10, 1247.                                                                           |
| FUSARIUM                             | <b>7A</b>   | gwm282        | Jia, G., Chen, P., Qin, G., Bai, G., Wang, X., Wang, S., ... & Liu, D. (2005). QTLs for Fusarium head blight response in a wheat DH population of Wangshuibai/Alondra's'. <i>Euphytica</i> , 146, 183-191.                                                                                                                                           |
| POWDERY MILDEW                       | <b>5BL</b>  | gpw7425       | Alam, M. A., Mandal, M. S. N., Wang, C., & Ji, W. (2013). Chromosomal location and SSR markers of a powdery mildew resistance gene in common wheat line N0308. <i>African Journal of microbiology research</i> , 7(6), 477-482.                                                                                                                      |
| LEAF RUST                            | <b>7B</b>   | barc340       | Maccaferri, M., Mantovani, P., Tuberosa, R., DeAmbrogio, E., Giuliani, S., Demontis, A., ... & Sanguineti, M. C. (2008). A major QTL for durable leaf rust resistance widely exploited in durum wheat breeding programs maps on the distal region of chromosome arm 7BL. <i>Theoretical and Applied Genetics</i> , 117, 1225-1240.                   |
| FUSARIUM                             | <b>3B</b>   | barc133       | Buerstmayr, M., Huber, K., Heckmann, J., Steiner, B., Nelson, J. C., & Buerstmayr, H. (2012). Mapping of QTL for Fusarium head blight resistance and morphological and developmental traits in three backcross populations derived from <i>Triticum dicoccum</i> × <i>Triticum durum</i> . <i>Theoretical and Applied Genetics</i> , 125, 1751-1765. |
| Pyrenophora tritici-repentis (Died.) | <b>3B</b>   | gwm285        | Singh, P. K., Gonzalez-Hernandez, J. L., Mergoum, M., Ali, S., Adhikari, T. B., Kianian, S. F., ... & Hughes, G. R. (2006). Identification and molecular mapping of a gene conferring resistance to <i>Pyrenophora tritici-repentis</i> race 3 in tetraploid wheat. <i>Phytopathology</i> , 96(8), 885-889.                                          |
| <b>Yield and quality</b>             |             | <b>Marker</b> |                                                                                                                                                                                                                                                                                                                                                      |
| Grain protein content - TKW          | <b>5AS</b>  | barc117       | Conti, V., Roncallo, P. F., Beaufort, V., Cervigni, G. L., Miranda, R., Jensen, C. A., & Echenique, V. C. (2011). Mapping of main and epistatic effect QTLs associated to grain protein and gluten strength using a RIL population of durum wheat. <i>Journal of applied genetics</i> , 52, 287-298.                                                 |
| Grain weight                         | <b>1B</b>   | Xgwm413       | Tyagi, S., Mir, R. R., Balyan, H. S., & Gupta, P. K. (2015). Interval mapping and meta-QTL analysis of grain traits in common wheat ( <i>Triticum aestivum</i> L.). <i>Euphytica</i> , 201, 367-380.                                                                                                                                                 |

|                             |            |         |                                                                                                                                                                                                                                                                                                      |
|-----------------------------|------------|---------|------------------------------------------------------------------------------------------------------------------------------------------------------------------------------------------------------------------------------------------------------------------------------------------------------|
| Grain weight                | <b>1B</b>  | Xgwm413 | Zanke, C. D., Ling, J., Plieske, J., Kollers, S., Ebmeyer, E., Korzun, V., ... & Röder, M. S. (2015). Analysis of main effect QTL for thousand grain weight in European winter wheat ( <i>Triticum aestivum</i> L.) by genome-wide association mapping. <i>Frontiers in plant science</i> , 6, 644.  |
| Grain protein content       | <b>3BS</b> | barc147 | Conti, V., Roncallo, P. F., Beaufort, V., Cervigni, G. L., Miranda, R., Jensen, C. A., & Echenique, V. C. (2011). Mapping of main and epistatic effect QTLs associated to grain protein and gluten strength using a RIL population of durum wheat. <i>Journal of applied genetics</i> , 52, 287-298. |
| Grain protein content - GY  | <b>3BS</b> | wms493  | Conti, V., Roncallo, P. F., Beaufort, V., Cervigni, G. L., Miranda, R., Jensen, C. A., & Echenique, V. C. (2011). Mapping of main and epistatic effect QTLs associated to grain protein and gluten strength using a RIL population of durum wheat. <i>Journal of applied genetics</i> , 52, 287-298. |
| Grain protein content       | <b>4AL</b> | barc170 | Conti, V., Roncallo, P. F., Beaufort, V., Cervigni, G. L., Miranda, R., Jensen, C. A., & Echenique, V. C. (2011). Mapping of main and epistatic effect QTLs associated to grain protein and gluten strength using a RIL population of durum wheat. <i>Journal of applied genetics</i> , 52, 287-298. |
| Sedimentation index         | <b>1BL</b> | cfa2129 | Conti, V., Roncallo, P. F., Beaufort, V., Cervigni, G. L., Miranda, R., Jensen, C. A., & Echenique, V. C. (2011). Mapping of main and epistatic effect QTLs associated to grain protein and gluten strength using a RIL population of durum wheat. <i>Journal of applied genetics</i> , 52, 287-298. |
| <b>Root traits</b>          |            |         |                                                                                                                                                                                                                                                                                                      |
| Root angle                  | <b>3AS</b> | wms5    | Sanguineti, M. C., Li, S., Maccaferri, M., Corneti, S., Rotondo, F., Chiari, T., & Tuberosa, R. (2007). Genetic dissection of seminal root architecture in elite durum wheat germplasm. <i>Annals of Applied Biology</i> , 151(3), 291-305.                                                          |
| ROOT ANGLE - Dough strenght | <b>5BS</b> | gwm234  | Sanguineti, M. C., Li, S., Maccaferri, M., Corneti, S., Rotondo, F., Chiari, T., & Tuberosa, R. (2007). Genetic dissection of seminal root architecture in elite durum wheat germplasm. <i>Annals of Applied Biology</i> , 151(3), 291-305.                                                          |
| primary root length         | <b>2AS</b> | gwm636  | Sanguineti, M. C., Li, S., Maccaferri, M., Corneti, S., Rotondo, F., Chiari, T., & Tuberosa, R. (2007). Genetic dissection of seminal root architecture in elite durum wheat germplasm. <i>Annals of Applied Biology</i> , 151(3), 291-305.                                                          |
| Root angle                  | <b>5A</b>  | wms205  |                                                                                                                                                                                                                                                                                                      |
| total seminal root length   | <b>7AL</b> | cfa2257 | Sanguineti, M. C., Li, S., Maccaferri, M., Corneti, S., Rotondo, F., Chiari, T., & Tuberosa, R. (2007). Genetic dissection of seminal root architecture in elite durum wheat germplasm. <i>Annals of Applied Biology</i> , 151(3), 291-305.                                                          |
| primary root length         | <b>5AL</b> | wmc727  | Sanguineti, M. C., Li, S., Maccaferri, M., Corneti, S., Rotondo, F., Chiari, T., & Tuberosa, R. (2007). Genetic dissection of seminal root architecture in elite durum wheat germplasm. <i>Annals of Applied Biology</i> , 151(3), 291-305.                                                          |
| Root angle                  | <b>4al</b> | gwm637  | Sanguineti, M. C., Li, S., Maccaferri, M., Corneti, S., Rotondo, F., Chiari, T., & Tuberosa, R. (2007). Genetic dissection of seminal root architecture in elite durum wheat germplasm. <i>Annals of Applied Biology</i> , 151(3), 291-305.                                                          |

|                                   |                |          |                                                                                                                                                                                                                                                                                                                     |
|-----------------------------------|----------------|----------|---------------------------------------------------------------------------------------------------------------------------------------------------------------------------------------------------------------------------------------------------------------------------------------------------------------------|
| Root angle                        | <b>6AS</b>     | gwm459   | Sanguineti, M. C., Li, S., Maccaferri, M., Corneti, S., Rotondo, F., Chiari, T., & Tuberosa, R. (2007). Genetic dissection of seminal root architecture in elite durum wheat germplasm. <i>Annals of Applied Biology</i> , 151(3), 291-305.                                                                         |
| Root angle                        | <b>6A</b>      | gwm427   | Cane, M. A., Maccaferri, M., Nazemi, G., Salvi, S., Francia, R., Colalongo, C., & Tuberosa, R. (2014). Association mapping for root architectural traits in durum wheat seedlings as related to agronomic performance. <i>Molecular Breeding</i> , 34, 1629-1645.                                                   |
| ROOT ANGLE - GPC                  | <b>5BL</b>     | gwm499   | Sanguineti, M. C., Li, S., Maccaferri, M., Corneti, S., Rotondo, F., Chiari, T., & Tuberosa, R. (2007). Genetic dissection of seminal root architecture in elite durum wheat germplasm. <i>Annals of Applied Biology</i> , 151(3), 291-305.                                                                         |
| <b>Shoot length - Heading day</b> |                |          |                                                                                                                                                                                                                                                                                                                     |
| Flowering time (Vrn-B1)           | <b>5B</b>      | Xgwm408  | Marzario, S., Logozzo, G., David, J. L., Zeuli, P. S., & Gioia, T. (2018). Molecular genotyping (SSR) and agronomic phenotyping for utilization of durum wheat ( <i>Triticum durum</i> Desf.) ex situ collection from Southern Italy: a combined approach including pedigreed varieties. <i>Genes</i> , 9(10), 465. |
| Heading day                       | <b>3BS</b>     | Xgwm389  | Sanguineti, M. C., Li, S., Maccaferri, M., Corneti, S., Rotondo, F., Chiari, T., & Tuberosa, R. (2007). Genetic dissection of seminal root architecture in elite durum wheat germplasm. <i>Annals of Applied Biology</i> , 151(3), 291-305.                                                                         |
| Heading day                       | <b>2AL</b>     | cfa2086  | Sanguineti, M. C., Li, S., Maccaferri, M., Corneti, S., Rotondo, F., Chiari, T., & Tuberosa, R. (2007). Genetic dissection of seminal root architecture in elite durum wheat germplasm. <i>Annals of Applied Biology</i> , 151(3), 291-305.                                                                         |
| Heading day                       | <b>3BS</b>     | gwm566   | Sanguineti, M. C., Li, S., Maccaferri, M., Corneti, S., Rotondo, F., Chiari, T., & Tuberosa, R. (2007). Genetic dissection of seminal root architecture in elite durum wheat germplasm. <i>Annals of Applied Biology</i> , 151(3), 291-305.                                                                         |
| Heading day                       | <b>1AL</b>     | gwm99    | Sanguineti, M. C., Li, S., Maccaferri, M., Corneti, S., Rotondo, F., Chiari, T., & Tuberosa, R. (2007). Genetic dissection of seminal root architecture in elite durum wheat germplasm. <i>Annals of Applied Biology</i> , 151(3), 291-305.                                                                         |
| Heading day                       | <b>7AS/7BS</b> | gwm573.2 | Sanguineti, M. C., Li, S., Maccaferri, M., Corneti, S., Rotondo, F., Chiari, T., & Tuberosa, R. (2007). Genetic dissection of seminal root architecture in elite durum wheat germplasm. <i>Annals of Applied Biology</i> , 151(3), 291-305.                                                                         |
| Shoot length                      | <b>3AS/3BS</b> | wmc505.1 | Sanguineti, M. C., Li, S., Maccaferri, M., Corneti, S., Rotondo, F., Chiari, T., & Tuberosa, R. (2007). Genetic dissection of seminal root architecture in elite durum wheat germplasm. <i>Annals of Applied Biology</i> , 151(3), 291-305.                                                                         |
| Shoot length/RDW (mg)/SDW (mg)    | <b>6BL</b>     | Xbarc134 | Sanguineti, M. C., Li, S., Maccaferri, M., Corneti, S., Rotondo, F., Chiari, T., & Tuberosa, R. (2007). Genetic dissection of seminal root architecture in elite durum wheat germplasm. <i>Annals of Applied Biology</i> , 151(3), 291-305.                                                                         |

|                                   |              |        |                                                                                                                                                                                                                                             |
|-----------------------------------|--------------|--------|---------------------------------------------------------------------------------------------------------------------------------------------------------------------------------------------------------------------------------------------|
| Shoot length/RDW<br>(mg)/TRL (cm) | <b>3AL</b>   | gwm155 | Sanguineti, M. C., Li, S., Maccaferri, M., Corneti, S., Rotondo, F., Chiari, T., & Tuberosa, R. (2007). Genetic dissection of seminal root architecture in elite durum wheat germplasm. <i>Annals of Applied Biology</i> , 151(3), 291-305. |
| shoot length -<br>Heading Day     | <b>7BL</b>   | Xgwm46 | Sanguineti, M. C., Li, S., Maccaferri, M., Corneti, S., Rotondo, F., Chiari, T., & Tuberosa, R. (2007). Genetic dissection of seminal root architecture in elite durum wheat germplasm. <i>Annals of Applied Biology</i> , 151(3), 291-305. |
| Shoot length                      | <b>2A/2B</b> | Xcfd50 | Sanguineti, M. C., Li, S., Maccaferri, M., Corneti, S., Rotondo, F., Chiari, T., & Tuberosa, R. (2007). Genetic dissection of seminal root architecture in elite durum wheat germplasm. <i>Annals of Applied Biology</i> , 151(3), 291-305. |
| Shoot length                      | <b>5BL</b>   | gwm213 | Sanguineti, M. C., Li, S., Maccaferri, M., Corneti, S., Rotondo, F., Chiari, T., & Tuberosa, R. (2007). Genetic dissection of seminal root architecture in elite durum wheat germplasm. <i>Annals of Applied Biology</i> , 151(3), 291-305. |
| Shoot length                      | <b>7AL</b>   | gwm332 | Sanguineti, M. C., Li, S., Maccaferri, M., Corneti, S., Rotondo, F., Chiari, T., & Tuberosa, R. (2007). Genetic dissection of seminal root architecture in elite durum wheat germplasm. <i>Annals of Applied Biology</i> , 151(3), 291-305. |

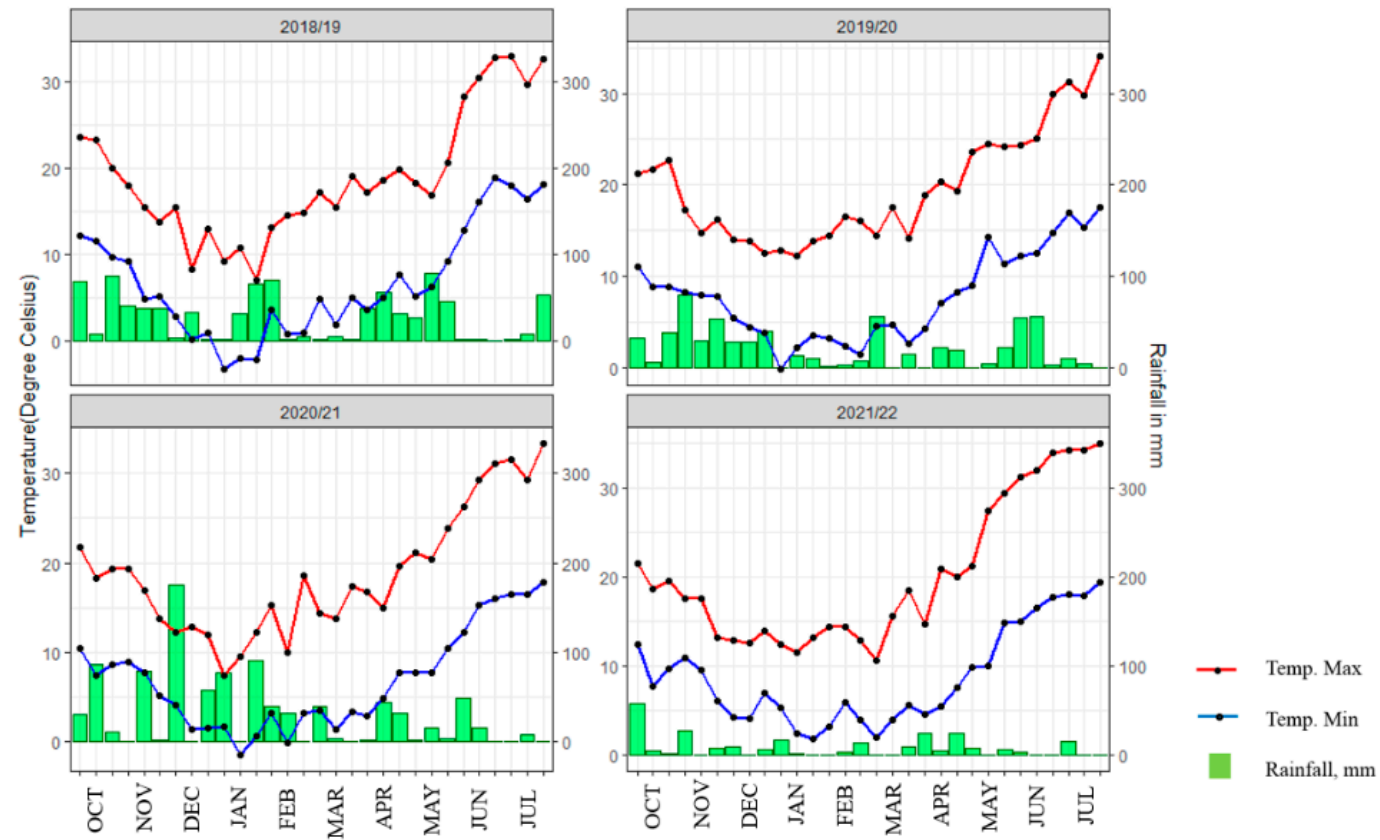

**Figure S1.** Climate data for four seasons.

A

| type   | Code              | Y     | PC1     | PC2      | PC3      |
|--------|-------------------|-------|---------|----------|----------|
| <chr>  | <chr>             | <dbl> | <dbl>   | <dbl>    | <dbl>    |
| 1 GEN  | Azeghar2-1(56)    | 34.02 | 0.3326  | 1.289    | -1.205   |
| 2 GEN  | Fuego             | 36.95 | 1.111   | -0.5720  | -1.261   |
| 3 GEN  | Gibraltar         | 34.38 | 0.09797 | 1.070    | 1.132    |
| 4 GEN  | HFN 94n           | 35.17 | -0.3390 | -0.7768  | -0.07659 |
| 5 GEN  | Icajin 38(64)     | 44.9  | -0.6372 | -0.5784  | 0.02539  |
| 6 GEN  | Iride             | 36.9  | 0.8744  | 0.8816   | -0.1988  |
| 7 GEN  | MVTD15-19         | 32.08 | 0.3423  | -0.7966  | 0.6969   |
| 8 GEN  | MVTD20-19         | 36.23 | -0.2097 | -0.08911 | 0.06336  |
| 9 GEN  | Mv-Makaroni       | 36.52 | 0.5731  | -0.9875  | 0.3971   |
| 10 GEN | Mv-Pelsodur       | 37.13 | -0.9515 | 0.8643   | 0.7887   |
| 11 GEN | Mv-Vekadur        | 35.02 | 1.134   | -0.5717  | 0.2480   |
| 12 GEN | Saragolla         | 33.52 | 1.508   | -0.03842 | -0.08633 |
| 13 GEN | Sebatel2-45       | 37.07 | -2.466  | -0.9547  | -0.6972  |
| 14 GEN | Senatore Cappelli | 44.12 | -1.066  | 1.212    | -0.4420  |
| 15 GEN | vulci             | 34.65 | -0.3051 | 0.04811  | 0.6154   |
| 16 ENV | IT2019            | 40.03 | 2.666   | -1.639   | -0.1279  |
| 17 ENV | IT2020            | 42.04 | -2.137  | -0.9767  | 1.534    |
| 18 ENV | IT2021            | 31.73 | 0.9780  | 2.505    | 0.6032   |
| 19 ENV | IT2022            | 32.50 | -1.508  | 0.1107   | -2.009   |

B

| type   | Code              | Y     | PC1      | PC2      | PC3      |
|--------|-------------------|-------|----------|----------|----------|
| <chr>  | <chr>             | <dbl> | <dbl>    | <dbl>    | <dbl>    |
| 1 GEN  | Azeghar2-1(56)    | 79.75 | -0.4258  | 0.05410  | 0.2337   |
| 2 GEN  | Fuego             | 81.57 | -0.5855  | -0.4681  | -0.1350  |
| 3 GEN  | Gibraltar         | 81.83 | -0.8796  | -0.1130  | 0.3052   |
| 4 GEN  | HFN 94n           | 80.03 | 1.259    | -0.2731  | -0.04911 |
| 5 GEN  | Icajin 38(64)     | 81.31 | 0.6571   | -0.8842  | -0.7298  |
| 6 GEN  | Iride             | 81.22 | -0.5433  | 0.2567   | -0.7845  |
| 7 GEN  | MVTD15-19         | 78.6  | -0.05935 | 1.192    | 0.1532   |
| 8 GEN  | MVTD20-19         | 77.41 | 0.1571   | -0.5958  | 0.6608   |
| 9 GEN  | Mv-Makaroni       | 78.2  | -0.8791  | 0.01806  | -0.3862  |
| 10 GEN | Mv-Pelsodur       | 79.86 | -0.06631 | -0.03367 | 0.1823   |
| 11 GEN | Mv-Vekadur        | 80.27 | -0.1440  | 0.4898   | -0.05956 |
| 12 GEN | Saragolla         | 78.81 | 0.2943   | 0.5376   | 0.2741   |
| 13 GEN | Sebatel2-45       | 79.17 | 0.7078   | -0.1650  | 0.2324   |
| 14 GEN | Senatore Cappelli | 82.04 | -0.3701  | -0.7489  | 0.2899   |
| 15 GEN | vulci             | 78.69 | 0.8782   | 0.7330   | -0.1873  |
| 16 ENV | IT2019            | 80.62 | 0.7466   | 1.054    | -0.9569  |
| 17 ENV | IT2020            | 80.27 | 0.9073   | 0.5037   | 1.109    |
| 18 ENV | IT2021            | 78.91 | -2.088   | 0.2247   | 0.08940  |
| 19 ENV | IT2022            | 79.87 | 0.4346   | -1.782   | -0.2411  |

Figure S2. Additive main effects and multiplicative interaction (AMMI 1) biplots show GEI of the 15 durum wheat varieties under 4 environments for **A** – thousand kernel weight (TKG), and **B** – The test weight (HLW).

A

|    | type  | Code     | Y     | PC1      | PC2      | PC3      |
|----|-------|----------|-------|----------|----------|----------|
|    | <chr> | <chr>    | <dbl> | <dbl>    | <dbl>    | <dbl>    |
| 1  | GEN   | Azeghar~ | 42.83 | -0.2420  | -1.213   | 1.376    |
| 2  | GEN   | Fuego    | 48.21 | -1.041   | -0.5894  | -0.3410  |
| 3  | GEN   | Gibralt~ | 42.52 | -0.4908  | -0.3847  | 0.9382   |
| 4  | GEN   | HFN 94n  | 43.85 | 1.413    | 1.309    | -0.3336  |
| 5  | GEN   | Icajin ~ | 35.95 | 1.127    | -3.065   | -1.221   |
| 6  | GEN   | Iride    | 45.52 | 0.4743   | -0.5754  | 1.937    |
| 7  | GEN   | MVTD15~~ | 40.2  | -1.671   | 0.8598   | -0.8499  |
| 8  | GEN   | MVTD20~~ | 37.63 | 1.414    | 1.453    | -1.168   |
| 9  | GEN   | Mv-Maka~ | 36.83 | -1.016   | 1.756    | 0.2601   |
| 10 | GEN   | Mv-Pels~ | 44.53 | -0.07954 | 0.9482   | 0.6419   |
| 11 | GEN   | Mv-Veka~ | 38.48 | -1.801   | -0.2634  | 0.1775   |
| 12 | GEN   | Saragol~ | 43.48 | 1.241    | 0.3673   | 0.7176   |
| 13 | GEN   | Sebatel~ | 45.07 | 2.176    | -0.2345  | -0.9007  |
| 14 | GEN   | Senator~ | 32.94 | 1.385    | 0.1260   | -0.06213 |
| 15 | GEN   | vulci    | 35.23 | -2.890   | -0.4943  | -1.172   |
| 16 | ENV   | IT2019   | 37.67 | 3.154    | 2.904    | 0.4845   |
| 17 | ENV   | IT2020   | 46.58 | -1.314   | -0.03165 | -3.065   |
| 18 | ENV   | IT2021   | 34.31 | -3.846   | 0.5878   | 1.834    |
| 19 | ENV   | IT2022   | 44.98 | 2.006    | -3.460   | 0.7462   |

B

|    | type  | Code     | Y     | PC1     | PC2       | PC3      |
|----|-------|----------|-------|---------|-----------|----------|
|    | <chr> | <chr>    | <dbl> | <dbl>   | <dbl>     | <dbl>    |
| 1  | GEN   | Azeghar~ | 12.92 | 0.1495  | 0.5795    | 0.1696   |
| 2  | GEN   | Fuego    | 13.34 | -0.2207 | -0.5509   | 0.7988   |
| 3  | GEN   | Gibralt~ | 13.12 | 0.06884 | -0.07195  | -0.4908  |
| 4  | GEN   | HFN 94n  | 12.96 | 0.3675  | 0.4193    | -0.1460  |
| 5  | GEN   | Icajin ~ | 13.92 | 0.7950  | -0.009473 | 0.6827   |
| 6  | GEN   | Iride    | 13.64 | 0.9786  | -0.9842   | -0.4754  |
| 7  | GEN   | MVTD15~~ | 14.75 | -1.569  | -0.1538   | 0.03134  |
| 8  | GEN   | MVTD20~~ | 13.85 | -0.3718 | -0.1220   | -0.08777 |
| 9  | GEN   | Mv-Maka~ | 13.49 | -0.6939 | 0.3277    | -0.2714  |
| 10 | GEN   | Mv-Pels~ | 12.99 | -0.1434 | -0.1023   | -0.1560  |
| 11 | GEN   | Mv-Veka~ | 13.27 | 0.2496  | 0.2302    | -0.4878  |
| 12 | GEN   | Saragol~ | 13.31 | 0.02846 | 0.3423    | 0.02997  |
| 13 | GEN   | Sebatel~ | 14.39 | 0.7059  | 0.4246    | 0.1189   |
| 14 | GEN   | Senator~ | 14.61 | 0.03393 | 0.1159    | 0.2697   |
| 15 | GEN   | vulci    | 14.61 | -0.3783 | -0.4449   | 0.01430  |
| 16 | ENV   | IT2019   | 11.47 | 1.332   | -0.8464   | -0.5516  |
| 17 | ENV   | IT2020   | 12.8  | -0.2340 | -0.3685   | 1.187    |
| 18 | ENV   | IT2021   | 12.91 | 0.7120  | 1.285     | -0.05448 |
| 19 | ENV   | IT2022   | 17.53 | -1.810  | -0.06971  | -0.5809  |

Figure S3. Additive main effects and multiplicative interaction (AMMI 1) biplots show GEI of the 15 durum wheat varieties under 4 environments for **A** – grain yield (GY), and **B** – protein content (PROT).



Table S3. The total Private alleles.

| <b>Locus</b> | <b>Trait</b>                         | <b>Allele</b> | <b>Frequency</b> | <b>Found in</b> |
|--------------|--------------------------------------|---------------|------------------|-----------------|
| Barc170      | GPC                                  | 164           | 0.5              | Azeghar         |
| Barc170      | GPC                                  | 102           | 0.5              | Azeghar         |
| xgwm18       | LEAF RUST                            | 164           | 0.5              | Azeghar         |
| xgwm18       | LEAF RUST                            | 102           | 0.5              | Azeghar         |
| Xgwm408      | Flowering time                       | 168           | 1                | Azeghar         |
| XGWM637      | Root angle                           | 175           | 1                | Azeghar         |
| barc117      | GPC - TKW                            | 220           | 1                | Fuego           |
| XGWM636      | primary root length                  | 115           | 1                | Fuego           |
| Barc147      | GPC - TKW                            | 136           | 1                | Gibraltar       |
| Barc170      | GPC                                  | 194           | 0.5              | Gibraltar       |
| WMS493       | GPC - GY                             | 161           | 0.5              | Gibraltar       |
| Xcfa2086     | Heading day                          | 269           | 1                | Gibraltar       |
| xgwm18       | LEAF RUST                            | 194           | 0.5              | Gibraltar       |
| XGWM234A     | ROOT ANGLE - Dough strenght          | 216           | 1                | Gibraltar       |
| XGWM285      | Pyrenophora tritici-repentis (Died.) | 220           | 1                | Gibraltar       |
| XGWM427      | Root angle                           | 228           | 1                | Gibraltar       |
| XGWM637      | Root angle                           | 158           | 1                | Gibraltar       |
| WMS493       | GPC - GY                             | 185           | 0.5              | Icajin          |
| WMS5         | Root angle                           | 171           | 1                | Icajin          |
| XCFA2257     | total seminal root length            | 160           | 1                | Icajin          |
| XCFD50       | Shoot length                         | 1             | 1                | Icajin          |
| XGWM332      | Shoot length                         | 206           | 0.5              | Icajin          |
| Xgwm408      | Flowering time                       | 196           | 1                | Icajin          |
| XGWM637      | Root angle                           | 183           | 1                | Icajin          |

|          |                                      |     |     |           |
|----------|--------------------------------------|-----|-----|-----------|
| XWMC505  | Shoot length                         | 143 | 1   | Icajin    |
| xwmc75   | POWDERY MILDEW                       | 320 | 0.5 | Iride     |
| xwmc75   | POWDERY MILDEW                       | 185 | 0.5 | Iride     |
| WMS493   | GPC - GY                             | 213 | 1   | Makaroni  |
| xgwm155  | Shoot length                         | 144 | 1   | Makaroni  |
| xgwm282  | FUSARIUM                             | 1   | 1   | Makaroni  |
| xwmc75   | POWDERY MILDEW                       | 267 | 0.5 | Makaroni  |
| Barc170  | GPC                                  | 179 | 0.5 | MVTD1519  |
| Barc3402 | LEAF RUST                            | 232 | 1   | MVTD1519  |
| xgwm18   | LEAF RUST                            | 179 | 0.5 | MVTD1519  |
| XGWM234B | ROOT ANGLE - Dough strenght          | 271 | 1   | MVTD1519  |
| XGWM427  | Root angle                           | 247 | 1   | MVTD1519  |
| XWMC727  | primary root length                  | 227 | 0.5 | MVTD1519  |
| xgwm155  | Shoot length                         | 439 | 0.5 | MVTD2019  |
| XGWM46   | shoot length - Heading day           | 190 | 1   | MVTD2019  |
| XBARC133 | FUSARIUM                             | 98  | 1   | MvVekadur |
| XCFA2257 | total seminal root length            | 220 | 0.5 | MvVekadur |
| xgwm282  | FUSARIUM                             | 188 | 1   | MvVekadur |
| XGWM285  | Pyrenophora tritici-repentis (Died.) | 248 | 1   | MvVekadur |
| XGWM332  | Shoot length                         | 217 | 0.5 | MvVekadur |
| XGWM332  | Shoot length                         | 200 | 0.5 | MvVekadur |
| Xgwm408  | Flowering time                       | 169 | 1   | MvVekadur |
| XGWM637  | Root angle                           | 166 | 1   | MvVekadur |
| WMS493   | GPC - GY                             | 154 | 1   | Pelsodur  |
| XGWM46   | shoot length - Heading day           | 260 | 1   | Pelsodur  |
| XGWM636  | primary root length                  | 131 | 1   | Pelsodur  |
| XWMC727  | primary root length                  | 1   | 0.5 | Pelsodur  |

|          |                                         |     |     |            |
|----------|-----------------------------------------|-----|-----|------------|
| Barc3402 | LEAF RUST                               | 231 | 1   | Saragolla  |
| WMS5     | Root angle                              | 185 | 1   | S.Cappelli |
| Xcfa2086 | Heading day                             | 275 | 1   | S.Cappelli |
| XGWM285  | Pyrenophora tritici-repentis<br>(Died.) | 238 | 1   | S.Cappelli |
| XGWM637  | Root angle                              | 180 | 1   | S.Cappelli |
| xgwm282  | FUSARIUM                                | 216 | 1   | Sebatel    |
| XGWM637  | Root angle                              | 174 | 1   | Sebatel    |
| Barc3402 | LEAF RUST                               | 228 | 1   | Vulci      |
| xgwm282  | FUSARIUM                                | 171 | 0.5 | Vulci      |
| xgwm282  | FUSARIUM                                | 155 | 0.5 | Vulci      |
| XGWM332  | Shoot length                            | 282 | 0.5 | Vulci      |
| XGWM637  | Root angle                              | 191 | 1   | Vulci      |

Table S4. The Private alleles for six selected genotypes.

| Locus    | Trait                                       | Allele | Frequency | Found in   |
|----------|---------------------------------------------|--------|-----------|------------|
| barc117  | GPC - TKW                                   | 220    | 1         | Fuego      |
| XGWM636  | primary root length                         | 115    | 1         | Fuego      |
| WMS493   | GPC - GY                                    | 185    | 0.5       | Icajin     |
| WMS5     | Root angle                                  | 171    | 1         | Icajin     |
| XCFA2257 | total seminal root length                   | 160    | 1         | Icajin     |
| XCFD50   | Shoot length                                | 1      | 1         | Icajin     |
| XGWM332  | Shoot length                                | 206    | 0.5       | Icajin     |
| Xgwm408  | Flowering time                              | 196    | 1         | Icajin     |
| XGWM637  | Root angle                                  | 183    | 1         | Icajin     |
| XWMC505  | Shoot length                                | 143    | 1         | Icajin     |
| xwmc75   | POWDERY MILDEW                              | 320    | 0.5       | Iride      |
| xwmc75   | POWDERY MILDEW                              | 185    | 0.5       | Iride      |
| WMS493   | GPC - GY                                    | 154    | 1         | Pelsodur   |
| XGWM46   | shoot length - Heading Day                  | 260    | 1         | Pelsodur   |
| XGWM636  | primary root length                         | 131    | 1         | Pelsodur   |
| XWMC727  | primary root length                         | 1      | 0.5       | Pelsodur   |
| WMS5     | Root angle                                  | 185    | 1         | S.Cappelli |
| Xcfa2086 | Heading day                                 | 275    | 1         | S.Cappelli |
| XGWM285  | <i>Pyrenophora tritici-repentis</i> (Died.) | 238    | 1         | S.Cappelli |
| XGWM637  | Root angle                                  | 180    | 1         | S.Cappelli |
| xgwm282  | FUSARIUM                                    | 171    | 0.5       | Vulci      |
| xgwm282  | FUSARIUM                                    | 155    | 0.5       | Vulci      |
| XGWM332  | Shoot length                                | 282    | 0.5       | Vulci      |
| XGWM637  | Root angle                                  | 191    | 1         | Vulci      |
| Barc3402 | LEAF RUST                                   | 228    | 1         | Vulci      |

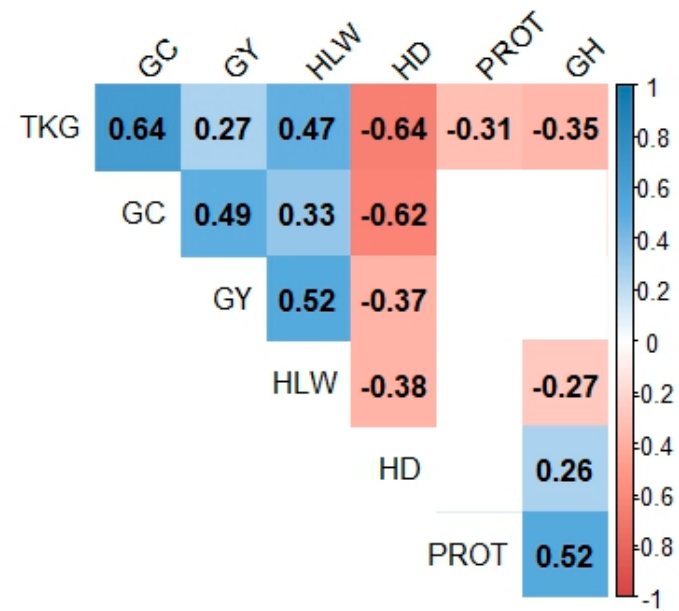

Figure S4. Positive significant correlation (in blue) and negative significant correlation (in red) among all traits. The grain yield (GY), test weight (HLW), protein content (PROT), thousand kernel weight (TKG), the heading day (HD), ground cover (GC), and growth habit (GH).
